# Supplementary material for: SETD2 Is Recurrently Mutated in Whole-Exome Sequenced Canine Osteosarcoma
Source: Oxford University Press journal article supplement (doi:10.1158/0008-5472.can-17-3558), 2018-05-03
Supplement: 00085472can173558-sup-192527_2_supp_4714491_p7r1lg.xlsx [file 00085472can173558-sup-192527_2_supp_4714491_p7r1lg.xlsx]

## Sheet: Gistic FocalSCNA Del. Genes
Supplementary Table 5 – GISTIC Classified Deletion Gene List
wide peak boundaries	cytoband	q value	residual q value	genes in wide peak
chr1:102690126-103711061	1q34	0.042898	0.042898	PRPF31
chr2:1-74398730	2q32	0.0031097	0.16344	IL6ST, CCL17, CES1, HMGN2, CUBN, MT2A, MT4, MT1E, GDI2, OCLN, IL2RA, CREM, SMN, CD52, ATP1B1, EPB41, CES5A, CDK2AP1, COMMD3, VIM, SEPHS1, LOC478000, LOC478001, SLC23A1, SPINK5, GPX8, GOT2, SLC9A1, TAF9, BMI1, GAD2, ST8SIA6, HTR1A, CX3CL1, SLC6A2, NOD2, RCC1, PTAFR, AKR1C3, PTPLA, PFDN1, BTF3, TAF12, SEPN1, ANKHD1, EIF4EBP3, SNHG3, CNGB1, AK6
chr2:77574730-79719722	2q35	0.012849	0.039588	DDOST
chr3:64577123-69401959	3q32	0.00010488	0.0043522	ZNF518B, WDR1
chr3:84490001-94000000	3q35.2	0.0038058	0.18609	PDE6B, TMED11
chr5:32390700-32845409	5q21	0.00019145	0.00019145	TP53, TNFSF12, TNFSF13, EIF4A1
chr6:31498588-40708582	6q21.3	0.13009	0.13009	DNASE1, SSTR5, PAM16, LOC448801, SLC9A3R2, HAGHL, PKD1, TNFRSF12A, SEPX1, LOC100049001, LOC100855540, LOC100855558
chr7:38962765-41559571	7q17	0.052696	0.052696	RHBG, BCAN
chr9:48513881-49619228	9q25	0.00013364	0.00013364	PTGDS, FUT7, LHX3
chr10:16694326-19940784	10q14	0.0024005	0.0024005	SELO
chr11:40821523-45641896	11q15	3.4512e-44	5.2925e-39	IFNA7, CDKN2B
chr11:51375594-52519999	11q21	0.0078762	0.1115	ARHGEF39, CA9
chr14:1-42809999	14q21.1	0.10127	0.10127	LEP, COL1A2, PON2, ABCB1, GNGT1, IL6, CYCS, COR2T18, SLC35B4, PODXL, CALCR, PEG10, HOXA10, AKR1B1, CRSP-4, CAFA-T2R2, MYEOV2, ARF1
chr16:7460674-45931034	16q13	0.078313	0.12016	MTPN, KCNH2, NOS3, ADRB3, LUC7L2, ADAM9, STAR, DLC1, F11, KLKB1, HIPK2, SSPO, FASTK, FUT10, VDAC3, C16H7orf55, MBOAT4
chr16:59011861-62000000	16q25.2	0.00014492	0.0003641	DEFB105A
chr18:21410065-32565471	18q21	4.6036e-11	2.7337e-08	HRAS, LOC610760
chr18:1-25644026	18q21	1.555e-06	0.022051	HGF, DLD, SEC61G, CD36
chr19:1-56000000	19q25	0.012873	0.012873	EPB41L5, UCP1, IL15, IL2, IL21, LOC476104, TMEM185B, DBI, CNTNAP5, CXCR4, GYPC
chr20:37546741-39129891	20q15.3	7.0202e-07	4.4541e-05	GNAI2
chr20:53465145-61000000	20q17	0.0029195	0.073247	TJP3, CAPS, ELANE, FUT5, OAZ1, NCLN, MADCAM1, TNFSF14, MAP2K2, LSM7
chr21:28900001-29136621	21q22	1.555e-06	0.0017811	cOR56B2, cOR52N9
chr21:29605711-30508785	21q22	0.0026899	0.049098	TPP1
chr22:1-45271802	22q22	1.9096e-05	1.9096e-05	EDNRB, HTR2A, ATP7B, CLN5, MLNR, NDUFB6
chr24:43658254-50000000	24q25	0.13181	0.13655	EDN3, COL9A3
chr25:50301921-54000000	25q24	6.3104e-05	6.3104e-05	STK25, KIF1A
chr26:28736097-29360513	26q24	4.4541e-05	8.854e-05	ZDHHC8
chr26:31123629-42000000	26q25	2.1261e-07	2.5001e-06	PTEN, LIPF
chr27:6640608-19784317	27q11	0.0004578	0.00092142	COL2A1, RAPGEF3
chr27:33612705-35043784	27q22.1	0.020201	0.055203	TAS2R42, TAS2R10, CAFA-T2R12, TAS2R7, CAFA-T2R67, CAFA-T2R43
chr28:1-44000000	28q18	0.070187	0.067889	RET, KCNIP2, ABCC2, ACTR1A, INPP5A, PNLIPRP1, CYP2C18, FGFR2, CYP2E1, MGMT, CXCL12, ALOX5, O3FAR1, PRDX3, COR6D7, PLCE1, ADRB1, MCMBP
chr29:1-17819999	29q15	0.028739	0.029452	RP1, ASPH, RAB2A, PRKDC, SNAI2, CRH, SGK3, UBE2V2
chr30:1-30207348	30q12	0.073247	0.14374	ANXA2, RAD51, DUOX1, FGF7, SRP14, SEC11C, GATM, SERF2, FBN1, ALDH1A2, LIPC, PLA2G4B, CYP19A1, RAB27A, JMJD7, B2M
chr30:34421475-43000000	30q15.2	0.0079181	0.035361	COX5A, CYP1A2
chr32:1-41000000	32q14	0.16344	0.16344	PPP3CA, EGF, TACR3, PDE5A, NFKB1, OSTC, CXCL10, ABCG2, HPGDS, BMPR1B, H2AFZ, PIGY, ARSJ, FGF5, ADH5, PYURF
chr34:19160001-36691134	34q14	0.019008	0.019008	ADIPOQ, IL12A, SST, BCL6
chr38:1-23316220	38q15.2	0.04584	0.070517	OPTC, SLAMF1, FCER1G, REN, DSTYK, EIF2D, CDC73, FCER1A, MGST3
chr38:23385325-26000000	38q15.2	1.4113e-05	1.7265e-05	TLR5
